# Supplementary material for: Molecular Cytogenetics Reveals Mosaicism in Human Umbilical Vein Endothelial Cells
Source: MDPI journal article supplement (doi:10.3390/genes13061012), 2022-06-03
Supplement: s1 [file s1]

|    | ch 1 | ch 2 | ch 3 | ch 4 | ch 5 | ch 6 | ch 7 | ch 8 | ch 9 | ch 10 | ch 11 | ch 12 | ch 13 | ch 14 | ch 15 | ch 16 | ch 17 | ch 18 | ch 19 | ch 20 | ch 21 | ch 22 | ch X |
|----|------|------|------|------|------|------|------|------|------|-------|-------|-------|-------|-------|-------|-------|-------|-------|-------|-------|-------|-------|------|
| 1  | 11   | 22   | 33   | 44   | 55   | 66   | 77   | 88   | 99   | 1010  | 1111  | 1212  | 1313  | 1414  | 1515  | 1616  | 1717  | 1818  | 1919  | 2020  | 2121  | 2222  | X    |
| 2  | 21   | 32   | 43   | 54   | 65   | 76   | 87   | 98   | 109  | 1110  | 1211  | 1312  | 1413  | 1514  | 1615  | 1716  | 1817  | 1918  | 2019  | 2120  | 2221  | X     | 2    |
| 3  | 31   | 42   | 53   | 64   | 75   | 86   | 97   | 108  | 119  | 1210  | 1311  | 1412  | 1513  | 1614  | 1715  | 1816  | 1917  | 2018  | 2119  | 2220  | X     | 3     | 3    |
| 4  | 41   | 52   | 63   | 74   | 85   | 96   | 107  | 118  | 129  | 1310  | 1411  | 1512  | 1613  | 1714  | 1815  | 1916  | 2017  | 2118  | 2219  | X     | 4     | 4     | 4    |
| 5  | 51   | 62   | 73   | 84   | 95   | 106  | 117  | 128  | 139  | 1410  | 1511  | 1612  | 1713  | 1814  | 1915  | 2016  | 2117  | 2218  | X     | 5     | 5     | 5     | 5    |
| 6  | 61   | 72   | 83   | 94   | 105  | 116  | 127  | 138  | 149  | 1510  | 1611  | 1712  | 1813  | 1914  | 2015  | 2116  | 2217  | X     | 6     | 6     | 6     | 6     | 6    |
| 7  | 71   | 82   | 93   | 104  | 115  | 126  | 137  | 148  | 159  | 1610  | 1711  | 1812  | 1913  | 2014  | 2115  | 2216  | X     | 7     | 7     | 7     | 7     | 7     | 7    |
| 8  | 81   | 92   | 103  | 114  | 125  | 136  | 147  | 158  | 169  | 1710  | 1811  | 1912  | 2013  | 2114  | 2215  | X     | 8     | 8     | 8     | 8     | 8     | 8     | 8    |
| 9  | 91   | 102  | 113  | 124  | 135  | 146  | 157  | 168  | 179  | 1810  | 1911  | 2012  | 2113  | 2214  | X     | 9     | 9     | 9     | 9     | 9     | 9     | 9     | 9    |
| 10 | 101  | 112  | 123  | 134  | 145  | 156  | 167  | 178  | 189  | 1910  | 2011  | 2112  | 2213  | X     | 10    | 10    | 10    | 10    | 10    | 10    | 10    | 10    | 10   |
| 11 | 111  | 122  | 133  | 144  | 155  | 166  | 177  | 188  | 199  | 2010  | 2111  | 2212  | X     | 11    | 11    | 11    | 11    | 11    | 11    | 11    | 11    | 11    | 11   |
| 12 | 121  | 132  | 143  | 154  | 165  | 176  | 187  | 198  | 209  | 2110  | 2211  | X     | 12    | 12    | 12    | 12    | 12    | 12    | 12    | 12    | 12    | 12    | 12   |
| 13 | 131  | 142  | 153  | 164  | 175  | 186  | 197  | 208  | 219  | 2210  | X     | 13    | 13    | 13    | 13    | 13    | 13    | 13    | 13    | 13    | 13    | 13    | 13   |
| 14 | 141  | 152  | 163  | 174  | 185  | 196  | 207  | 218  | 229  | X     | 14    | 14    | 14    | 14    | 14    | 14    | 14    | 14    | 14    | 14    | 14    | 14    | 14   |
| 15 | 151  | 162  | 173  | 184  | 195  | 206  | 217  | 228  | X    | 15    | 15    | 15    | 15    | 15    | 15    | 15    | 15    | 15    | 15    | 15    | 15    | 15    | 15   |
| 16 | 161  | 172  | 183  | 194  | 205  | 216  | 227  | X    | 16   | 16    | 16    | 16    | 16    | 16    | 16    | 16    | 16    | 16    | 16    | 16    | 16    | 16    | 16   |
| 17 | 171  | 182  | 193  | 204  | 215  | 226  | X    | 17   | 17   | 17    | 17    | 17    | 17    | 17    | 17    | 17    | 17    | 17    | 17    | 17    | 17    | 17    | 17   |
| 18 | 181  | 192  | 203  | 214  | 225  | X    | 18   | 18   | 18   | 18    | 18    | 18    | 18    | 18    | 18    | 18    | 18    | 18    | 18    | 18    | 18    | 18    | 18   |
| 19 | 191  | 202  | 213  | 224  | X    | 19   | 19   | 19   | 19   | 19    | 19    | 19    | 19    | 19    | 19    | 19    | 19    | 19    | 19    | 19    | 19    | 19    | 19   |
| 20 | 201  | 212  | 223  | X    | 20   | 20   | 20   | 20   | 20   | 20    | 20    | 20    | 20    | 20    | 20    | 20    | 20    | 20    | 20    | 20    | 20    | 20    | 20   |
| 21 | 211  | 222  | X    | 21   | 21   | 21   | 21   | 21   | 21   | 21    | 21    | 21    | 21    | 21    | 21    | 21    | 21    | 21    | 21    | 21    | 21    | 21    | 21   |
| 22 | 221  | X    | 22   | 22   | 22   | 22   | 22   | 22   | 22   | 22    | 22    | 22    | 22    | 22    | 22    | 22    | 22    | 22    | 22    | 22    | 22    | 22    | 22   |
| 23 | 231  | X    | 23   | 23   | 23   | 23   | 23   | 23   | 23   | 23    | 23    | 23    | 23    | 23    | 23    | 23    | 23    | 23    | 23    | 23    | 23    | 23    | 23   |
| 24 | 241  | X    | 24   | 24   | 24   | 24   | 24   | 24   | 24   | 24    | 24    | 24    | 24    | 24    | 24    | 24    | 24    | 24    | 24    | 24    | 24    | 24    | 24   |
| 25 | 251  | X    | 25   | 25   | 25   | 25   | 25   | 25   | 25   | 25    | 25    | 25    | 25    | 25    | 25    | 25    | 25    | 25    | 25    | 25    | 25    | 25    | 25   |
| 26 | 261  | X    | 26   | 26   | 26   | 26   | 26   | 26   | 26   | 26    | 26    | 26    | 26    | 26    | 26    | 26    | 26    | 26    | 26    | 26    | 26    | 26    | 26   |
| 27 | 271  | X    | 27   | 27   | 27   | 27   | 27   | 27   | 27   | 27    | 27    | 27    | 27    | 27    | 27    | 27    | 27    | 27    | 27    | 27    | 27    | 27    | 27   |
| 28 | 281  | X    | 28   | 28   | 28   | 28   | 28   | 28   | 28   | 28    | 28    | 28    | 28    | 28    | 28    | 28    | 28    | 28    | 28    | 28    | 28    | 28    | 28   |
| 29 | 291  | X    | 29   | 29   | 29   | 29   | 29   | 29   | 29   | 29    | 29    | 29    | 29    | 29    | 29    | 29    | 29    | 29    | 29    | 29    | 29    | 29    | 29   |
| 30 | 301  | X    | 30   | 30   | 30   | 30   | 30   | 30   | 30   | 30    | 30    | 30    | 30    | 30    | 30    | 30    | 30    | 30    | 30    | 30    | 30    | 30    | 30   |

**Supplemental Figure S1.** Comparison of 30 karyograms of HUVECs analyzed by G-banding.

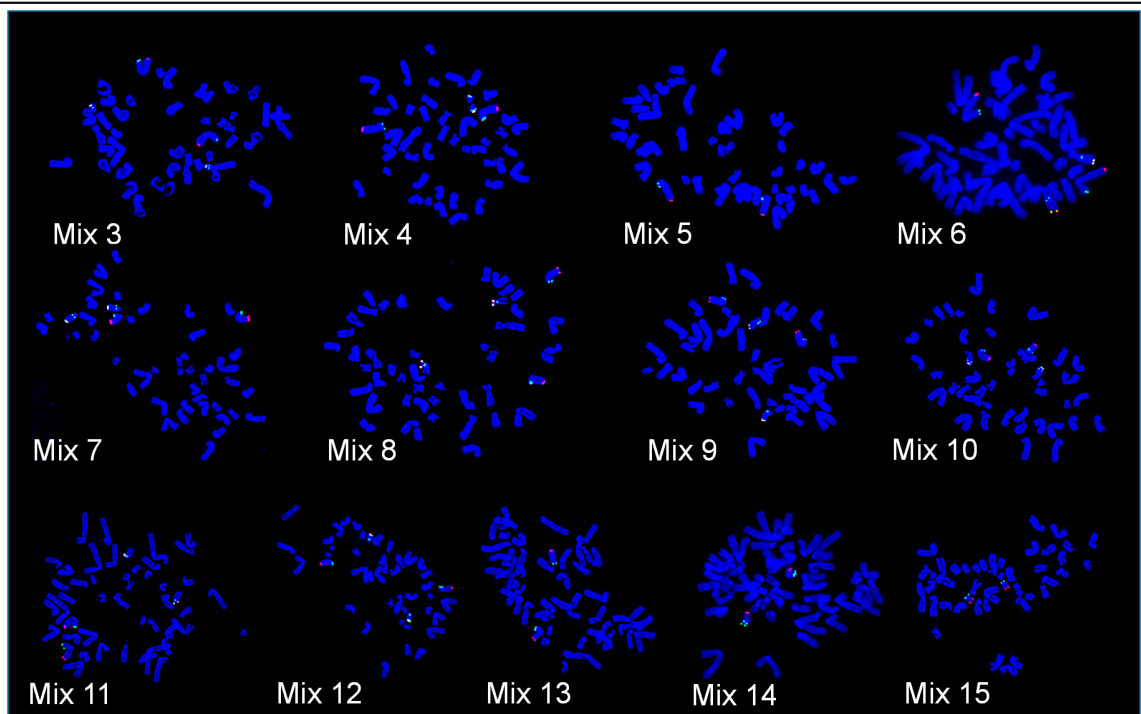

**Supplemental Figure S2.** Signal patterns for ToTelVysion mixes 3-15 (See Table 1 for the details)

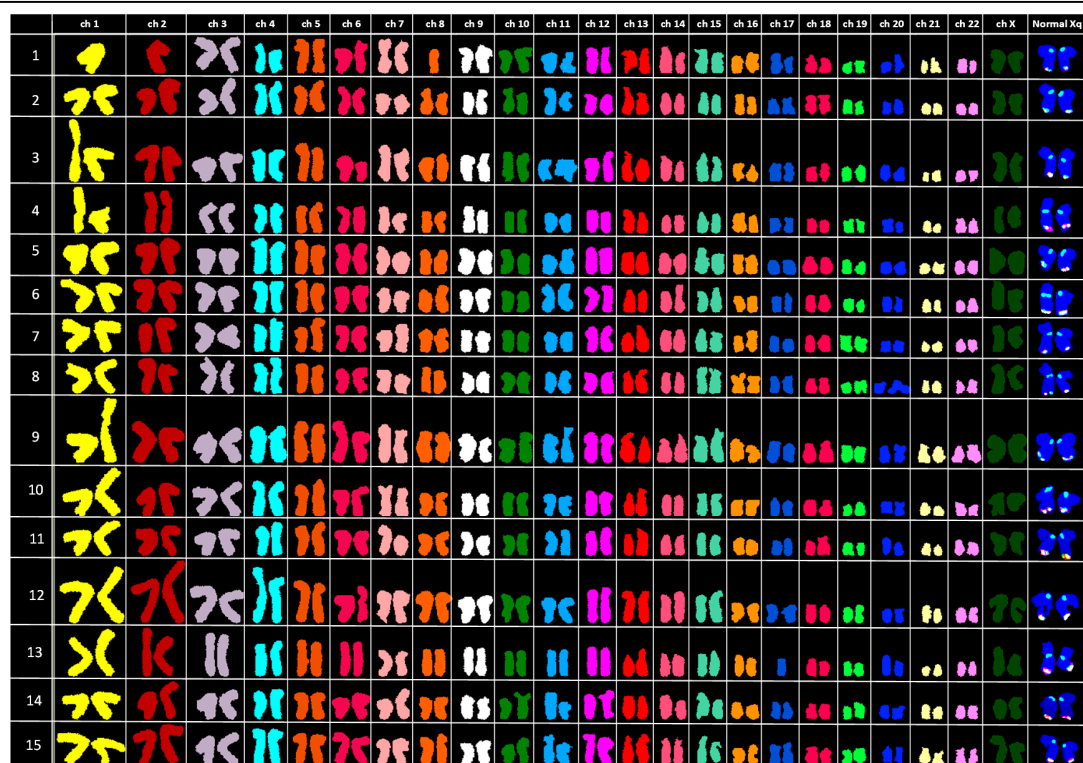

**Supplemental Figure S3.** Comparison of 15 classified SKY cells with subsequent hybridization using ToTelVysion mix 2 showing a normal Xq ter.

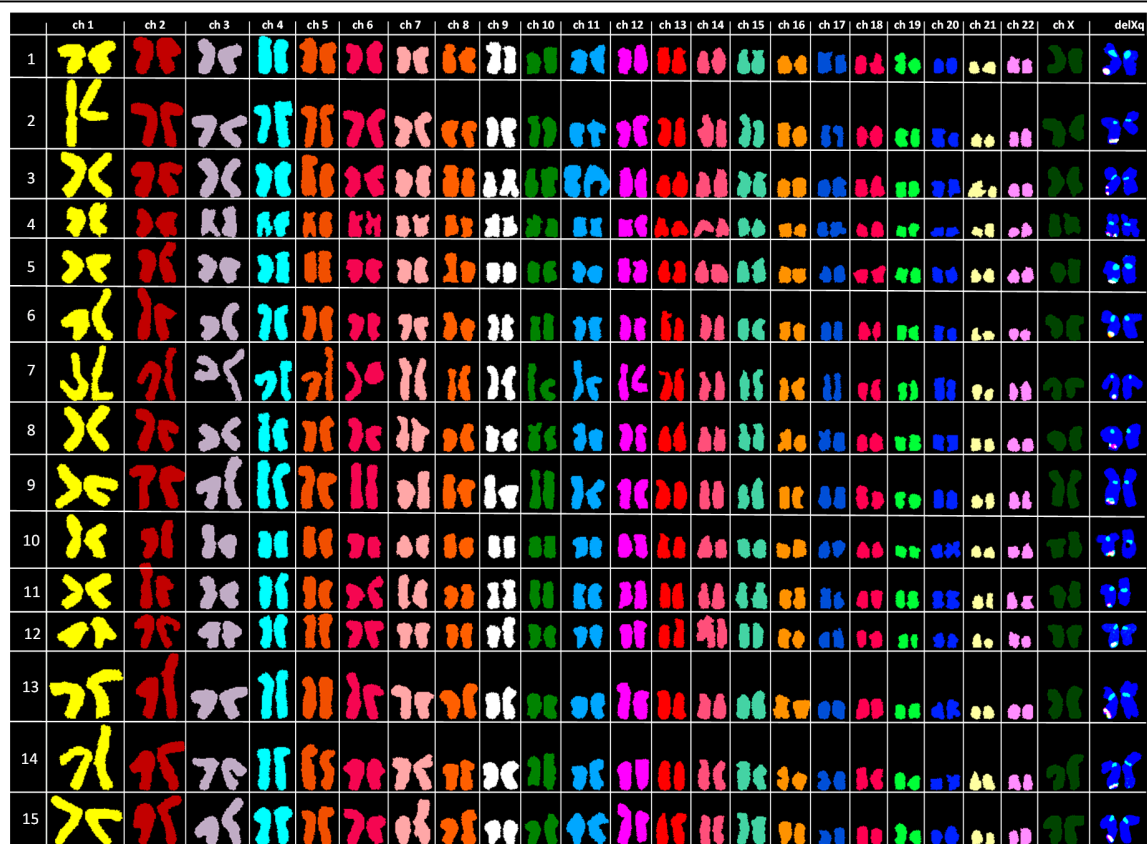

**Supplemental Figure S4.** Comparison of 15 classified SKY cells with subsequent hybridization with ToTelVysion mix 2 showing a deletion of one Xq homologue in each cell.
